# Supplementary material
Source: PubMed Central journal article supplement (PMC2785158)

## **Supplementary data**

### **Supplementary Figure Legends**

**Supplementary Fig. I.** Akt phosphorylation was cytoprotective via upregulation of HIF-1 $\alpha$  expression. (A) Densitometric analysis of Western blots in Fig. 1E showing increased phosphorylation of Akt (Ser-473) and Erk1/2 (Thr-202/Tyr-204), and Bcl-xl protein expression in <sup>PC</sup>MSCs with 2 cycles of 30-min I/R ( $\checkmark$  &  $\text{F}$  vs all other groups of cells  $p < 0.05$ ). (B) TUNEL staining showed higher number of apoptotic cells in the 30-min 3 cycles treated cell as compared with 30-min 1 cycle and 30-min 2 cycles treatment (C) Western blot showing elevated pAkt in <sup>PC</sup>MSCs which was abrogated by 50  $\mu$ M Wort pretreatment of the cells. (D) IP-induced nuclear HIF-1 $\alpha$  expression was abolished by Akt inhibition ( $\checkmark$  vs  $\Psi$   $p < 0.01$ ;  $\text{F}$  vs  $\Psi$   $p = NS$ ;  $\checkmark$  vs  $\text{F}$   $p < 0.01$ ). (E) Cytoprotective effect of IP was abolished by Akt inhibition as determined by LDH release assay ( $\checkmark$  &  $\text{F}$  vs all other groups of cells  $p < 0.05$ ). (F) RT-PCR showed upregulation of miR-210 in <sup>PC</sup>MSCs. Multiple cycles of I/R was more effective to induce miR-210 than single cycle of I/R.

**Supplementary Fig. II.** IP with multiple cycles of brief I/R enhances miR-210 expression. (A) Knockdown of miR-210 increased apoptosis as examined by TUNEL staining ( $\checkmark$  &  $\text{F}$  vs all other groups of cells  $p < 0.05$ ) (original magnification x200, green= TUNEL<sup>+</sup> nuclei, blue= DAPI). (B) RT-PCR to show that pretreatment of the cell with 50  $\mu$ M Wort inhibited IP-induced miR-210.

**Supplementary Fig. III.** The role of IP-induced HIF-1 $\alpha$  in regulation of miR-210 expression and apoptosis. Knockdown of HIF-1 $\alpha$  and abrogation of miRNAs lead to higher TUNEL positivity in <sup>PC</sup>MSCs transfected with HIF-1 specific siRNA (magnification x200, green= TUNEL<sup>+</sup> nuclei and blue= DAPI;  $\checkmark$  vs  $\text{F}$   $p < 0.01$ ).

**Supplementary Fig. IV.** (A) Real-time PCR showing higher level expression of *Casp8ap2* in miR-210 abrogated <sup>PC</sup>MSCs upon exposure to 6h anoxia ( $p < 0.01$  vs controls). (B) Fluorescence images showing TUNEL positive cells in <sup>PC</sup>MSCs and non-<sup>PC</sup>MSCs transfected with *Casp8ap2* siRNA as compared with their counterparts with Sc siRNA. Quantitative data is shown in Fig. 3F.

### **Supplementary Table-I: List of the antibodies used.**

| <b>Antibody</b>                | <b>Dilution used</b> | <b>Source</b>             |
|--------------------------------|----------------------|---------------------------|
| Anti-p-Akt (ser-473)           | 1:500                | Cell Signaling Technology |
| Anti p-p44/p42 (Thr202/Tyr204) | 1:500                | Cell Signaling Technology |
| Bcl-xl                         | 1:1000               | Cell Signaling Technology |
| Anti HIF-1 $\alpha$            | 1:1000               | Novus Biological          |
| Anti actin                     | 1:2000               | Santa Cruz Biotechnology  |

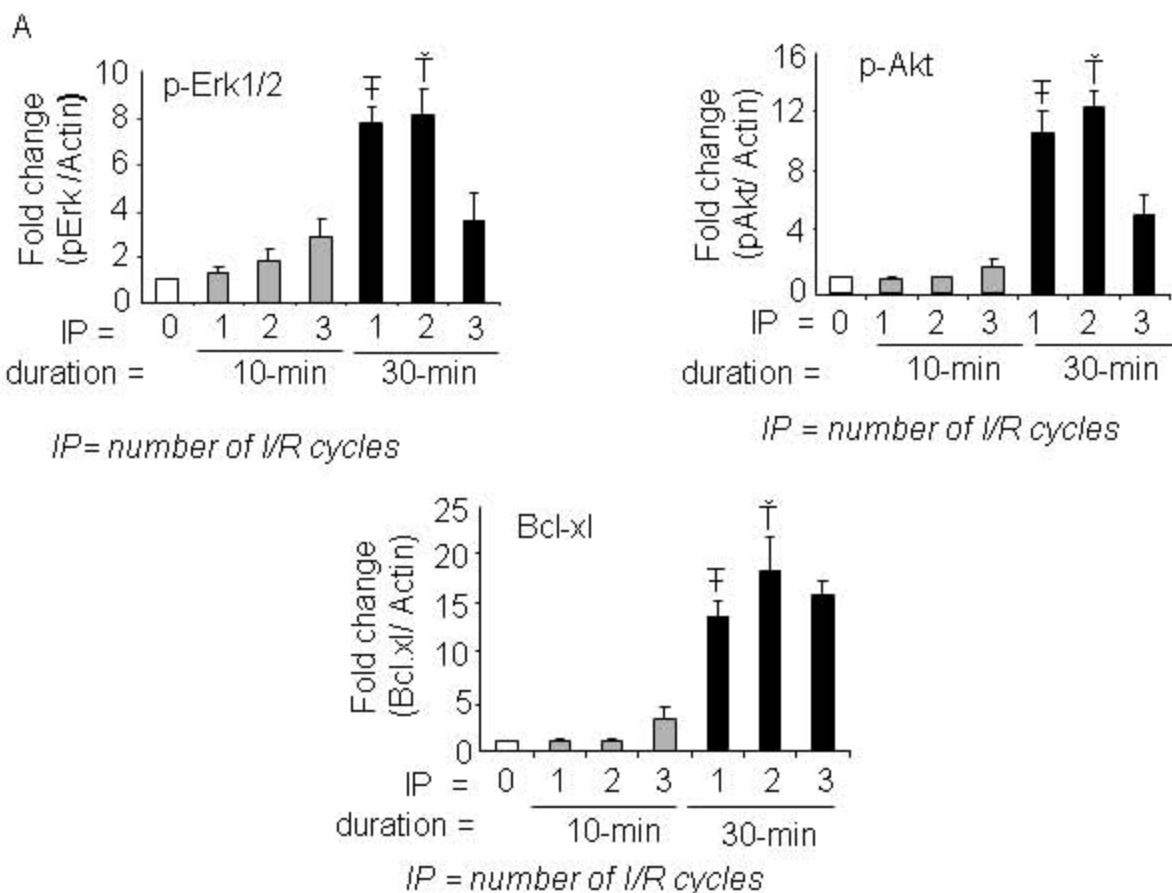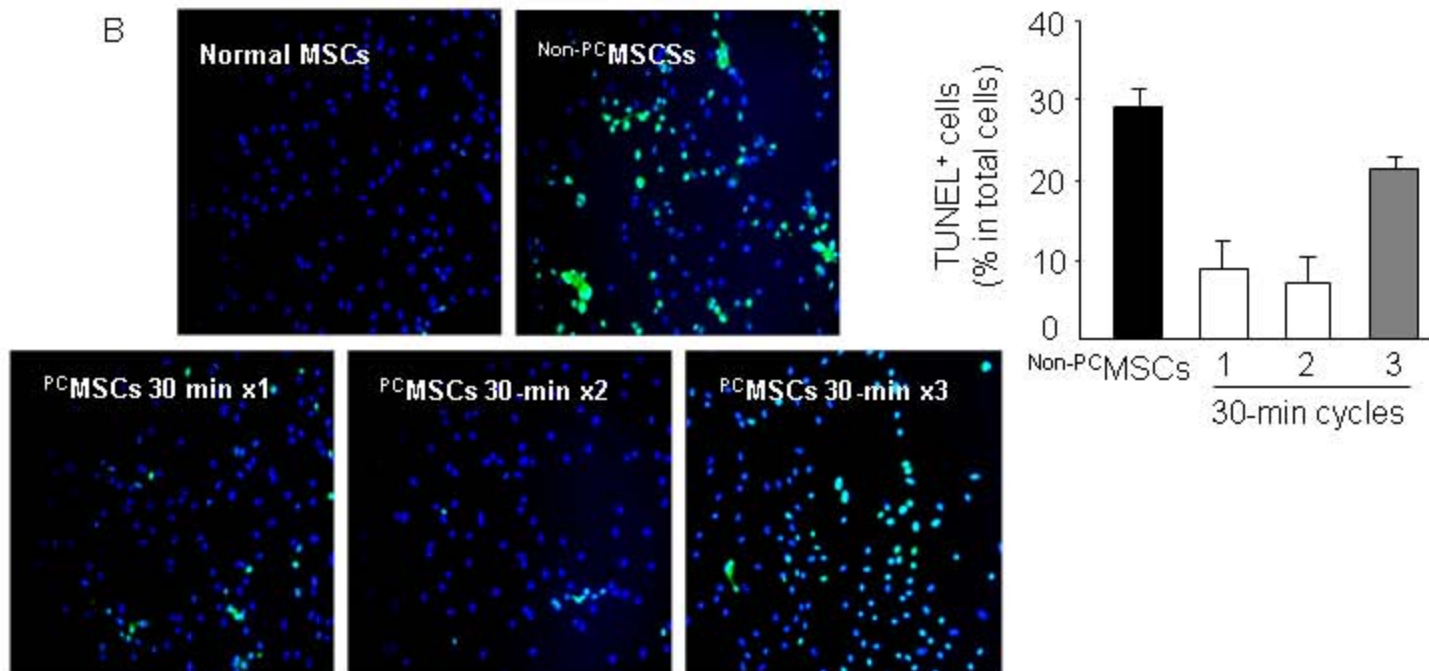

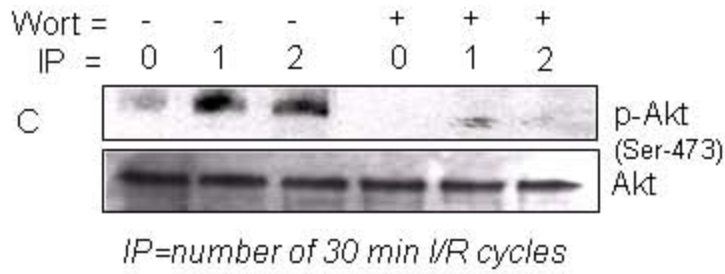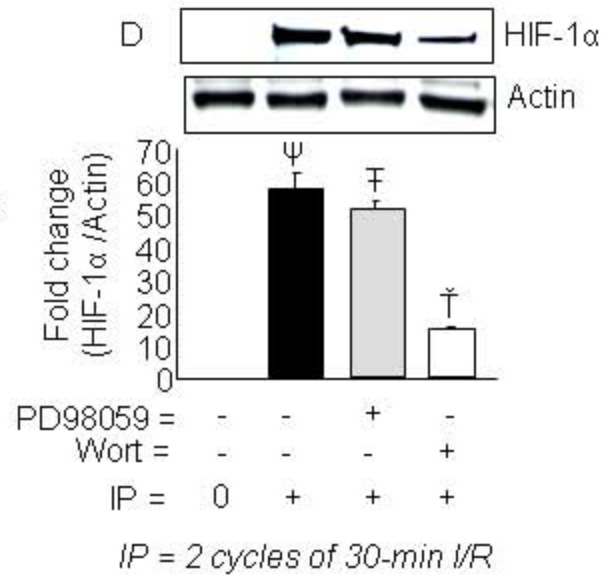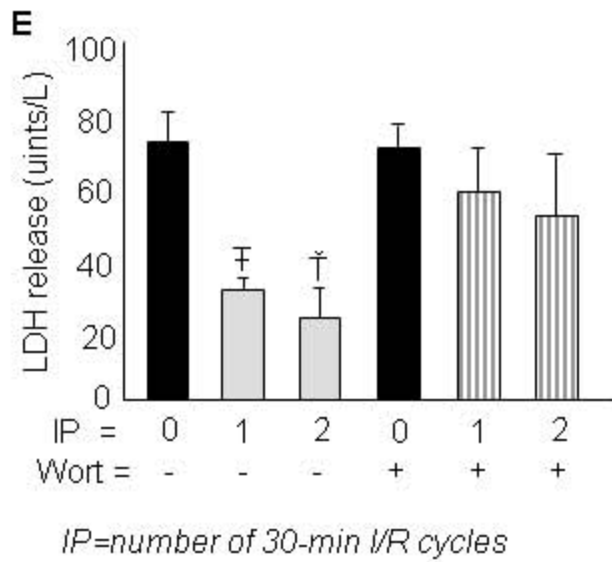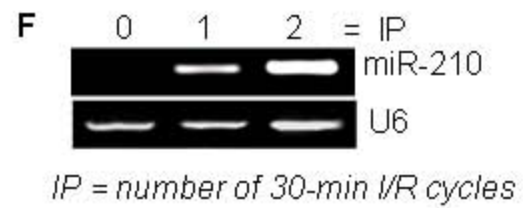

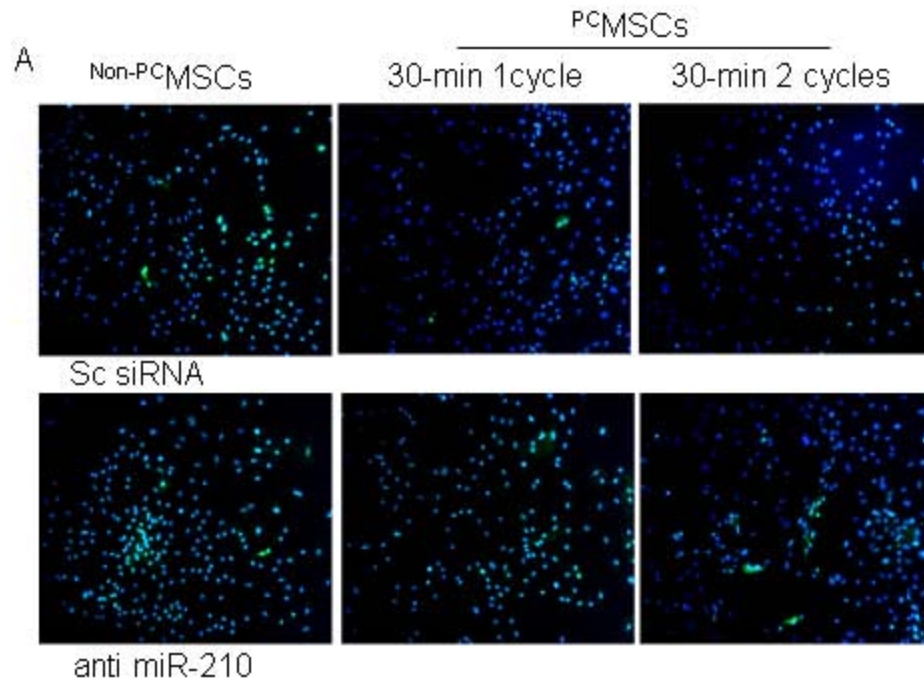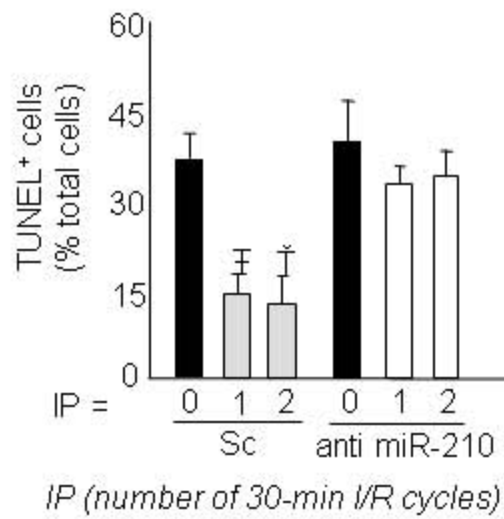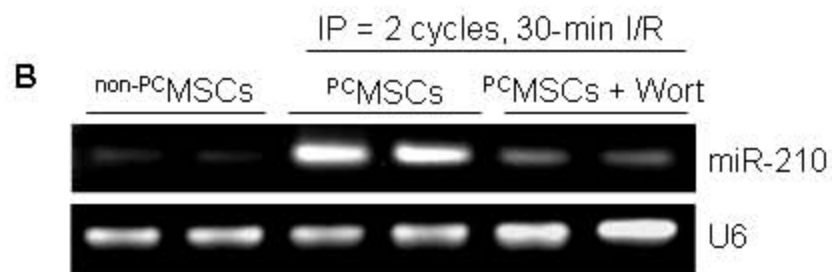

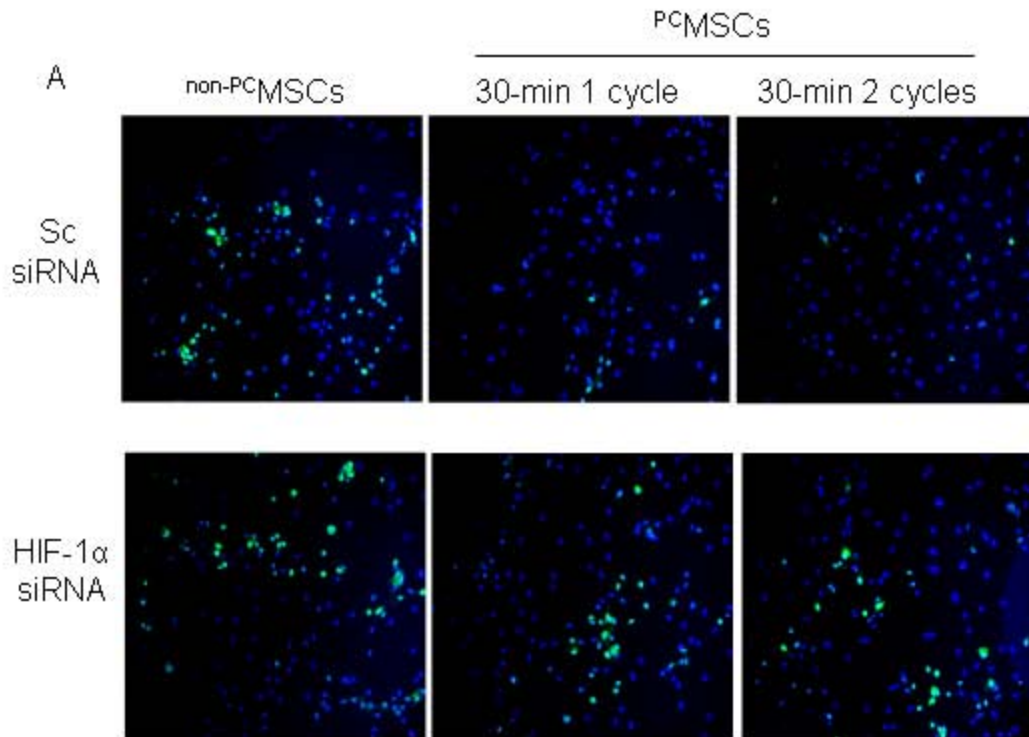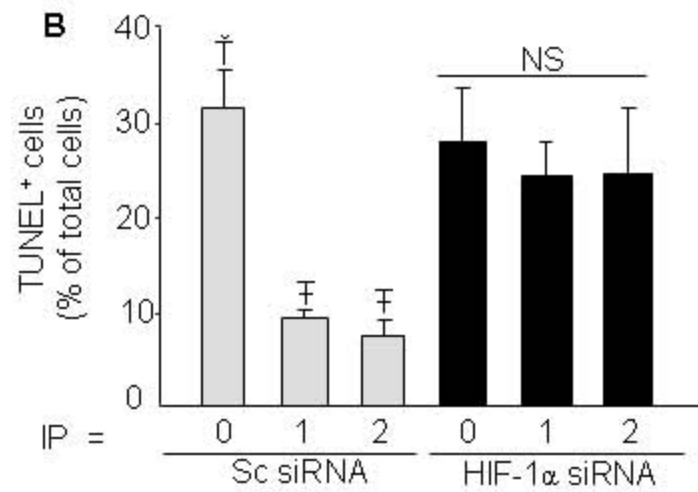

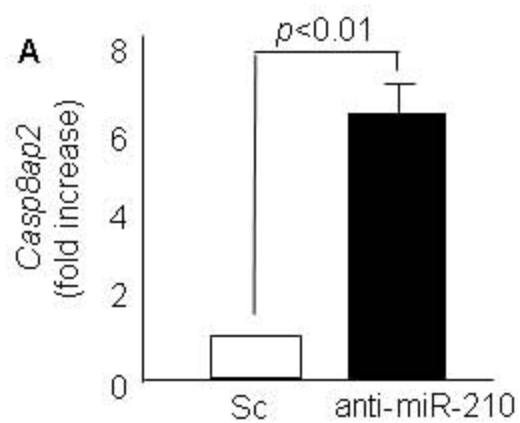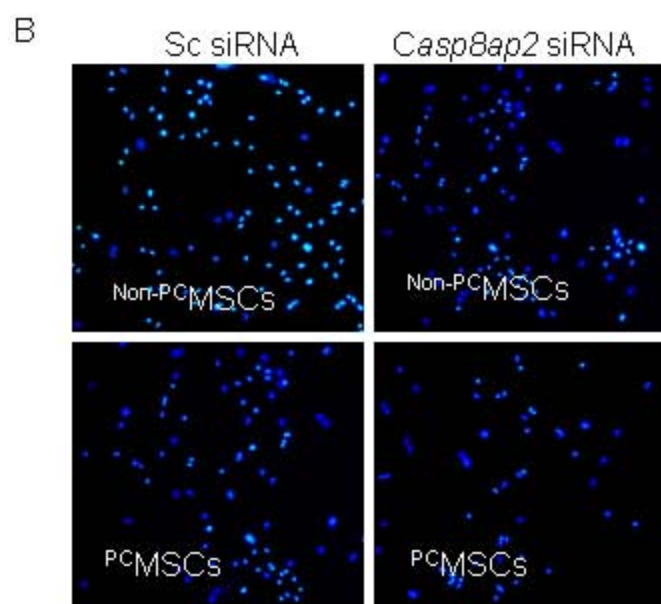

Supplement: supp_M109.020925_Suppldata.pdf [file supp_M109.020925_Suppldata.pdf]
